to know the doses of succinylcholine used in the MMR patients as compared with the "normals," the time interval between the administration of succinylcholine and attempted intubation, and whether jaw tightness was confirmed by a second anesthesiologist.

Because in all but one of the cases in her series the surgery continued, it would appear that jaw relaxation did occur and that intubation was possible. The duration of MMR, therefore, would also be of interest.

While the associations between strabismus surgery, MMR, and MHS remain to be fully elucidated, we agree with the opinion expressed by Rosenberg that (certainly in the strabismus surgical population) succinylcholine is a drug that should now be reserved for specific indications.<sup>7</sup>

NATHAN SCHWARTZ, M.D.  
*Assistant Professor of Anesthesiology and Pediatrics*

JAMES B. EISENKRAFT, M.D.  
*Associate Professor of Anesthesiology,  
Director, Anesthesia Research*

EDWARD L. RAAB, M.D.  
*Professor of Ophthalmology and Associate Professor of  
Pediatrics*

Anesthesiology  
69:636, 1988

*In Reply:*—In our patients with masseter muscle spasm, the average dose of succinylcholine was 1.17 mg/kg, and no patient received more than 1.6 mg/kg. This is a conservative dose, consistent with a dose of 1–2 mg/kg in use in our department at the time. Unfortunately, we cannot report the interval between succinylcholine administration and onset of masseter spasm. Finally, jaw tightness was not consistently confirmed by a second anesthesiologist. The old records are unclear on this point which, of course, is a problem with retrospective chart review.

Anesthesiology  
69:636–637, 1988

### Modified Anesthetic Screen for Pediatric Surgery

*To the Editor:*—The conventional anesthetic screen divides the operating table into two areas; *i.e.*, a clean working area for the surgeon

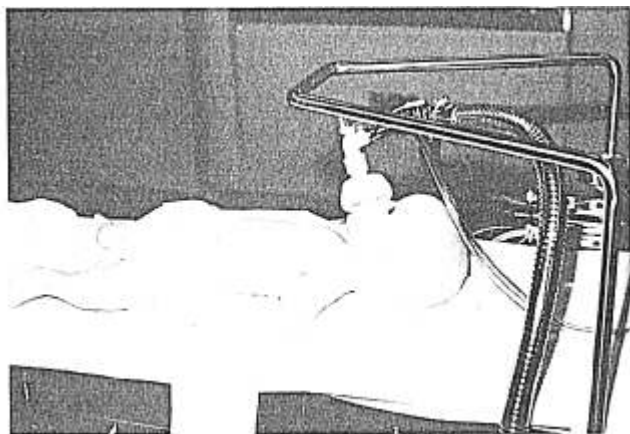

FIG. 1. Modified anesthetic screen positioned on the table.

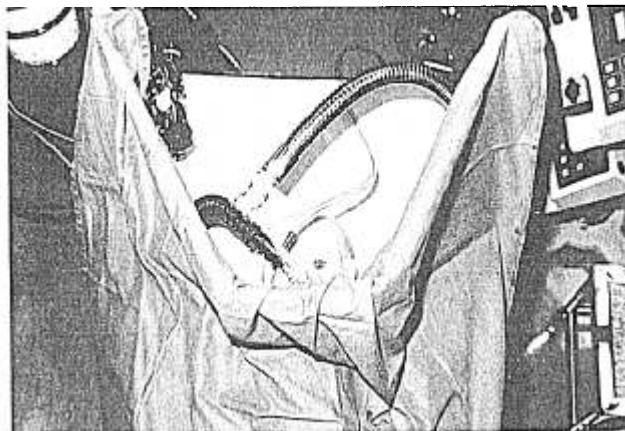

FIG. 2. Draped screen.

Mount Sinai School of Medicine  
of the City University of New York  
New York, New York 10029

### REFERENCES

1. Carroll JB: Increased incidence of masseter spasm in children with strabismus anesthetized with halothane and succinylcholine. *ANESTHESIOLOGY* 67:559–561, 1987
2. Rosenberg H, Fletcher JE: Masseter muscle rigidity and malignant hyperthermia susceptibility. *Anesth Analg* 65:161–164, 1986
3. Ellis FR, Halsall PJ: Suxamethonium spasm: A differential diagnostic conundrum. *Br J Anaesth* 56:381–383, 1984
4. Schwartz L, Rockoff MA, Koka BV: Masseter spasm with anesthesia: Incidence and implications. *ANESTHESIOLOGY* 61:772–775, 1984
5. Lincoff HA, Breinin GM, De Voe AG: The effect of succinylcholine on the extraocular muscles. *Am J Ophthalmol* 43:440–444, 1957
6. Mindel JS, Raab EL, Eisenkraft JB, Teutsch G: Succinylcholine-induced return of the eyes to the basic deviation. *Ophthalmology* 87:1288–1295, 1980
7. Rosenberg H: Trismus is not trivial (editorial). *ANESTHESIOLOGY* 67:453–455, 1987

(Accepted for publication June 23, 1988.)

JOAN B. CARROLL, M.D.  
*Department of Anesthesiology  
The University of Tennessee, Memphis  
One Children's Plaza  
Memphis, Tennessee 38103-2883*

(Accepted for publication June 23, 1988.)
